# Supplementary material for: N-Cetyltrimethylammonium Bromide-Modified Zeolite Na-A from Waste Fly Ash for Hexavalent Chromium Removal from Industrial Effluent
Source: MDPI journal article supplement (doi:10.3390/jcs6090256), 2022-09-05
Supplement: s1 [file s1]

# N-cetyltrimethylammonium bromide-modified zeolite Na-A from waste fly ash for hexavalent chromium removal from industrial effluent

Angaru Ganesh Kumar Reddy <sup>1</sup>, Lingamdinne Lakshmi Prasanna <sup>1</sup>, Koduru Janardhan Reddy <sup>1\*</sup>, Chang Yoon-young Chang <sup>1\*</sup>

<sup>1</sup>Department of Environmental Engineering, Kwangwoon University, Seoul, 01897, Republic of Korea.

\* Correspondence: author's e-mail: reddyjchem@gmail.com; reddyjchem@kw.ac.kr (J.R. Koduru); yy-chang@kw.ac.kr (Y.Y. Chang)

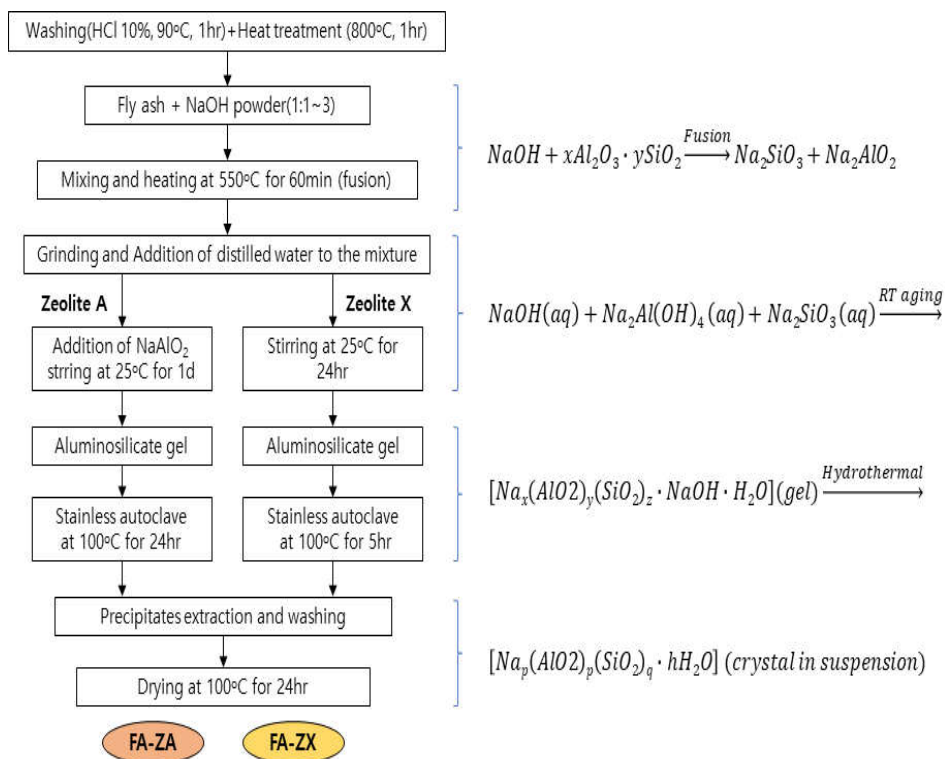

**Figure S1.** Synthesis of Zeolite (Na-A and Na-X ) from Coal fly ash (Choi et al., 2019).

## Assessment of sorption behavior

The influence of the reaction rate on the initial metal ion concentration was examined for the pseudo-first-order (PFO), pseudo-second-order (PSO), and Elvovich kinetic models using CTAB@FZA, as given in Eqs. (1),(2), and (3) respectively:

$$\text{PFO kinetic equation: } \text{Log}(Q_e - Q_t) = \text{Log}Q_e - \left(\frac{k_1}{2.03}\right)t \quad (1)$$

$$\text{PSO kinetic equation: } \frac{t}{Q_t} = \frac{1}{k_2 Q_e^2} + \left(\frac{1}{Q_e}\right)t \quad (2)$$

$$\text{Elvovich kinetic equation: } Q_t = \beta \ln(t) + \beta \ln(\alpha) \quad (3)$$

where  $q_e$  and  $q_t$  are the numbers of metal ions removed at equilibrium ( $\text{mg}\cdot\text{g}^{-1}$ );  $t$  is the adsorption duration (min);  $k_1$  and  $k_2$  are adsorption rate constants;  $\alpha$  ( $\text{mg}/\text{g}\cdot\text{min}$ ) is the initial rate constant, and  $\beta$  ( $\text{mg}/\text{g}$ ) is the desorption constant of the Elovich kinetics.

The adsorption isotherm behavior was analyzed using the isotherm models shown in Eqs. (4), (5), and (6):

$$\text{Langmuir isotherm equation: } \frac{C_e}{Q_e} = \left(\frac{1}{k_l + Q_m}\right) + \left(\frac{1}{Q_m}\right)C_e \quad (4)$$

$$\text{Freundlich isotherm equation: } \log Q_e = \log k_f + \left(\frac{1}{n}\right)\log K_c \quad (5)$$

$$\text{Temkin isotherm equation: } Q_e = \frac{RT}{bT} \ln AT + \frac{RT}{bT} \ln C_e \quad (6)$$

where the adsorbate equilibrium concentrations are represented by  $c_e$  ( $\text{mg L}^{-1}$ ) for the liquid phase and  $q_e$  ( $\text{mg g}^{-1}$ ) for the solid phases;  $q_m$  ( $\text{mg g}^{-1}$ ) indicates the maximum removal efficiency;  $b$  denotes the Langmuir adsorption equilibrium constant;  $K_f$  is the Freundlich equilibrium constant, which symbolizes the adsorption efficiency;  $1/n$  is the Freundlich adsorption constant, the reciprocal of the adsorption intensity;  $B$  is the Temkin isotherm constant; and  $K_T$  is the Temkin isotherm equilibrium binding constant.

The universal gas constant ( $R$ ) was adjusted to  $8.314 \text{ J}^{-1}\cdot\text{mol}^{-1}\cdot\text{K}$  and the temperature was applied individually for each isotherm test. Thermodynamic characteristics, such as enthalpy, entropy, and Gibbs free energy [ $\Delta H^0$ ,  $\Delta S$ , and  $\Delta G^0$ ] of the Cr(VI) removal by CTAB@FZA were subsequently determined using  $\ln K_c$  vs.  $1/T$ , as shown in Figure 5, and  $\Delta G^0$  was calculated as follows equation (7) and (8):

$$\Delta G = -RT \ln K_c \quad (7)$$

$$\Delta G = \Delta H - T\Delta S \quad (8)$$

where  $R$  is the ideal gas constant ( $8.314 \text{ kJ}\cdot\text{mol}^{-1}$ ) and  $T$  is temperature ( $^{\circ}\text{C}$ ).

The adsorptive batch studies were conducted using a range of conditions, such as initial pH (2–7), contact time (1–30 min), initial metal

concentration (10–300 mg/L at 298 K), temperature (298–338 K), coexisting anions (chlorine, phosphate, sulfate, and nitrate), and cations (sodium, potassium, calcium, and magnesium; 20 mg/L), to examine the adsorption process of CTAB@FZA towards Cr(VI). After removal, the supernatant was carefully decanted and used to determine the remaining concentrations of the pollutants in the solution.

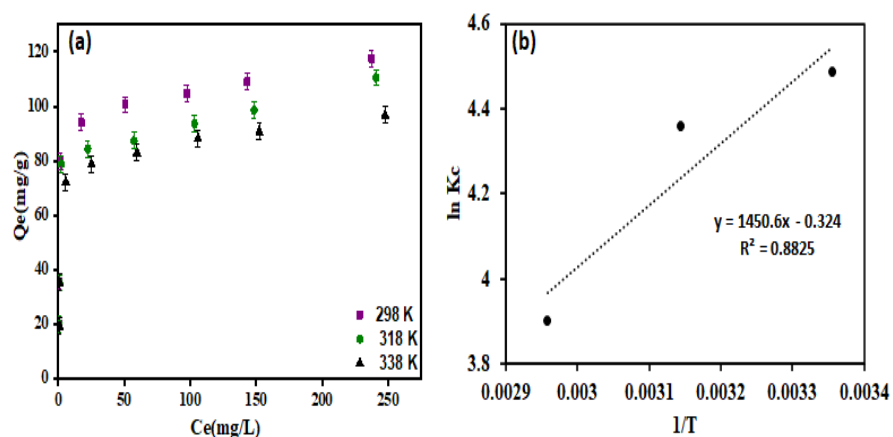

**Figure S2.** (a) Effect of temperature on Cr(VI) removal; (b) Adsorption thermodynamics.
